# Supplementary material for: No Evidence of SARS-CoV-2 Among Flies or Cockroaches in COVID-19 Positive Households
Source: Research Square preprint supplement (doi:10.21203/rs.3.rs-1005788/v1), 2021-11-01
Supplement: Supplementary file 1 [file 0a9043f7708f6c730eab2682.xlsx]

## Sheet: Table 1- Indoor Trap Results
Table 1. Taxa of insects collected on sticky traps deployed inside homes with at least one COVID-19 human case.
House ID	Trap Type	Days post-Dx	Days deployed	Blattodea	Calliphoridae				Dolichopodidae	Drosophilidae	Muscidae		Phoridae	Psychodidae	Sarcophagidae
					Lucilia	Cochliomyia	Phormia regina	other			M. domestica	other			Sarcophaga	Total	Unique Taxa
1	EZ	18	15	37	0	0	0	2	0	0	0	0	0	0	0	39	2
2	EZ	19	15	0	0	3	0	0	0	0	4	0	0	0	8	15	3
3	EZ	19	15	0	0	0	0	0	0	0	1	0	0	0	0	1	1
4	EZ	16	19	0	2	0	0	0	0	0	0	0	0	0	0	2	2
5*§	EZ	7	11	12	0	4	0	0	0	0	1	0	0	0	0	17	3
6	EZ	8	16	0	0	0	0	1	0	0	0	0	0	0	4	5	2
7	EZ	7	14	0	0	0	0	8	9	0	1	0	0	0	3	20	4
8	EZ	14	12	0	0	0	0	0	0	0	2	0	0	0	0	2	1
9*†‡	EZ	9	10	0	0	0	0	0	1	0	0	0	0	0	0	1	1
10	EZ	0	8	0	0	0	0	0	0	13	0	0	0	0	0	13	1
11	EZ	6	7	0	0	0	0	0	0	9	0	0	0	0	0	9	1
12	EZ	6	6	0	0	0	0	0	0	0	0	0	177	0	0	177	1
13*§‡	EZ	6	10	0	0	0	0	0	0	0	0	0	1	1	0	2	2
14	EZ	28	13	26	0	0	0	4	0	0	16	0	0	0	0	47	3
15	EZ	20	16	0	0	0	0	0	0	0	4	0	0	0	0	4	1
16	EZ	8	17	0	0	0	0	0	0	0	0	0	0	3	0	3	1
17*†‡§	EZ	3	13	0	0	0	0	2	0	0	0	0	0	0	0	2	1
18	EZ	4	10	0	0	0	0	0	10	0	0	0	0	0	0	10	1
19	EZ	6	13	0	0	0	0	0	0	7	0	1	0	0	0	8	2
20*	EZ	7	14	0	0	0	0	0	0	4	0	0	0	0	0	4	1
21	EZ	3	13	0	0	0	0	51	0	4	0	0	0	0	0	55	2
22	EZ	16	9	0	0	0	0	1	0	0	0	0	0	0	0	1	1
13*§‡	Gold Stick	6	18	0	0	0	0	0	0	0	0	0	2	0	0	2	1
7	Trapstik	7	14	0	0	0	0	5	0	0	0	0	0	0	0	5	1
8	Trapstik	14	12	0	0	0	0	0	0	0	1	0	0	0	0	1	1
10	Trapstik	0	8	0	0	0	0	0	0	4	0	0	0	0	0	4	1
11	Trapstik	6	7	0	0	0	0	1	0	0	0	0	0	0	0	1	1
20*	Trapstik	5	12	0	0	0	1	0	0	40	0	0	0	0	0	41	2
Totals				75	2	7	1	75	20	81	30	1	180	4	15	491
An animal in this household tested positive for SARS-CoV-2 in the nasal (*), oral (†), body (‡), or rectal (§) sample at the time of trap deployment
